# Supplementary material
Source: publisher site journal article supplement (https://www.dovepress.com/article/554075)
Supplement: Supplementary file 1 [file Revised%20Supplementary%20materials.docx]

**Supplementary Table1 Subgroup Analysis of the Association between Sema3A Levels and Vascular Comorbidities in the Healthy Control Group**

|  | Q1(N = 24)  （Sema3A＜4.96） | Q2(N = 26)  （4.96≤Sema3A＜5.72） | Q3(N = 24)  （5.72≤Sema3A＜6.45） | Q4(N = 26)  （Sema3A≥6.45） | p Value |
| --- | --- | --- | --- | --- | --- |
| Age，years（SD） | 60±10 | 57±11 | 61±14 | 64±15 | 0.382 |
| Sex，male，n（n%） | 10（41.7） | 14（53.8） | 11（45.8） | 13（50.0） | 0.849 |
| Hyperlipidemia，n（n%） | 1（4.2） | 4（15.4） | 4（16.7） | 8（30.8） | 0.097 |
| hypertension, n (n%) | 10（41.7） | 11（42.3） | 13（54.2） | 10（38.5） | 0.712 |
| Diabetes,n (n%) | 8（33.3） | 6（23.1） | 9（37.5） | 9（34.6） | 0.718 |

Abbreviations: SD, standard deviation.

**Supplementary Table 2 Comparison of clinical baseline data between the CI group and the Non-CI group**

|  | CI(N = 59) | Non-CI(N = 63) | p Value |
| --- | --- | --- | --- |
| **demographic characteristics** |  |  |  |
| Age，years（SD） | 67±10 | 59±11 | **＜0.001** |
| Sex，male，n（n%） | 29（49.2） | 40（63.5） | 0.110 |
| Pulse, beats/min（SD） | 73±12 | 71±10 | 0.383 |
| SBP, mmHg（SD） | 167±27 | 167±28 | 0.923 |
| DBP, mmHg（SD） | 90±19 | 92±17 | 0.386 |
| **Vascular risk factors** |  |  |  |
| Hyperlipidemia，n（n%） | 30（50.8） | 28（44.4） | 0.479 |
| hypertension, n (n%) | 46（78.0） | 40（63.5） | 0.080 |
| Diabetes,n (n%) | 26（44.1） | 18（28.6） | 0.075 |
| Smoking history,n (%) | 29（49.2） | 35（55.6） | 0.479 |
| Drinking history，n（%） | 17（28.8） | 19（30.2） | 0.871 |
| **Laboratory examination** |  |  |  |
| D-dimer(ng/L)（IQR） | 280（210，380） | 270（210，390） | 0.749 |
| Fibrinogen(g/L）（SD） | 3,14±0.68 | 2.93±0.62 | 0.080 |
| white blood cell count，109/L（IQR） | 7.99（6.45，9.58） | 6.77（5.78,7.79） | **0.007** |
| C-reactive protein，mg/L（IQR） | 0.50（0.50，2.68） | 0.50（0.50,1.05） | 0.051 |
| TG，mmol/L（IQR） | 1.24（0.92，1.99） | 1.19(0.87,1.72) | 0.786 |
| TC，mmol/L（SD） | 4.62±1.02 | 4.46±0.87 | 0.355 |
| HDL,mmol/L（IQR） | 1.15（0.98，1.30） | 1.08(0.91.1.25) | 0.247 |
| LDL,mmol/L（SD） | 2.86±0.74 | 2.95±0.73 | 0.485 |
| Homocysteine, μmol/L (IQR) | 12.40（10.00,15.65） | 10.80（9.76，12.37） | **0.029** |
| Blood glucose,mmol/L（IQR） | 5.77（4.92，7.25） | 5.11（4.65,6.27) | **0.044** |
| glycosylated hemoglobin，%(IQR) | 6.6（5.7，7.5） | 6.2(5.6,6.6) | 0.132 |
| Uric acid,μmol/L（SD） | 302.58±71.96 | 304.67±66.47 | 0.081 |
| Sema3A，ng/L（SD） | 9.00±2.66 | 6.49±1.40 | **＜0.001** |
| **Neuroimaging** |  |  |  |
| Total burden score，n（n%） | 3（2,3） | 1（0,1） | **＜0.001** |

Abbreviations: SBP,systolic blood pressure;DBP, diastolic blood pressure; TG, triglyceride;TC: total cholesterol;HDL:high density lipoprotein；LDL: low density lipoprotein;IQR, interquartile range; SD, standard deviation.

Bold indicates statistically significant P-values (P < 0.05)

**Supplementary Table 3 Comparison of clinical baseline data between CI subgroup,Non-CI subgroup,HC group**

|  | CI  (N = 59) | Non-CI  (N = 63) | HC  (N=100) | p Value |
| --- | --- | --- | --- | --- |
| **demographic characteristics** |  |  |  |  |
| Age，years（SD） | 67±10 | 59±11 | 61±13 | **＜0.001** |
| Sex，male，n（n%） | 29（49.2） | 40（63.5） | 48 (48) | 0.127 |
| Pulse, beats/min（SD） | 73±12 | 71±10 | 74±13 | 0.249 |
| SBP, mmHg（SD） | 167±27 | 167±28 | 137±20 | **＜0.001** |
| DBP, mmHg（SD） | 90±19 | 92±17 | 80±12 | **＜0.001** |
| **Vascular risk factors** |  |  |  |  |
| Hyperlipidemia，n（n%） | 30（50.8） | 28（44.4） | 17 (17) | **＜0.001** |
| hypertension, n (n%) | 46（78.0） | 40（63.5） | 44 (44) | **＜0.001** |
| Diabetes,n (n%) | 26（44.1） | 18（28.6） | 32 (32) | 0.161 |
| Smoking history,n (%) | 29（49.2） | 35（55.6） | 30 (30) | **0.003** |
| Drinking history，n（%） | 17（28.8） | 19（30.2） | 19 (19) | 0.193 |
| **Laboratory examination** |  |  |  |  |
| D-dimer(ng/L)（IQR） | 280（210，380） | 270（210，390） | 250 (200, 360) | 0.540 |
| Fibrinogen(g/L）（SD） | 3.06(2.65,3.66) | 2.83(2.50,3.45) | 2.85 (2.53, 3.16) | 0.089 |
| white blood cell count，109/L（IQR） | 7.99（6.45，9.58） | 6.77（5.78,7.79） | 6.53(5.26,8.22) | **0.004** |
| C-reactive protein，mg/L（IQR） | 0.50（0.50，2.68） | 0.50（0.50,1.05） | 0.5 (0.5,1.4) | 0.119 |
| TG，mmol/L（IQR） | 1.24（0.92，1.99） | 1.19(0.87,1.72) | 1.08 (0.75,1.58) | 0.087 |
| TC，mmol/L（SD） | 4.62±1.02 | 4.46±0.87 | 4.24±1.17 | 0.074 |
| HDL,mmol/L（IQR） | 1.15（0.98，1.30） | 1.08(0.91.1.25) | 1.12 (0.94.1.26) | 0.545 |
| LDL,mmol/L（SD） | 2.86±0.74 | 2.95±0.73 | 2.24±0.65 | **＜0.001** |
| Homocysteine,mmol/L(IQR) | 12.40（10.00,15.65） | 10.8（9.76，12.37） | 9.82(8.31,11.38) | **＜0.001** |
| Blood glucose,mmol/L（IQR） | 5.77（4.92，7.25） | 5.11（4.65,6.27) | 5.4 (4.76, 6.87) | 0.115 |
| glycosylated hemoglobin，%(IQR) | 6.6（5.7，7.5） | 6.2(5.6,6.6) | 6.2 (5.7, 6.6) | 0.141 |
| Uric acid,μmol/L（SD） | 302.58±71.96 | 304.67±66.47 | 312.56±93.54 | 0.332 |
| Sema3A，ng/L（SD） | 9.00±2.66 | 6.49±1.40 | 6.07± 1.82 | **＜0.001** |

Abbreviations: SBP,systolic blood pressure;DBP, diastolic blood pressure; TG, triglyceride;TC: total cholesterol;HDL:high density lipoprotein；LDL: low density lipoprotein;IQR, interquartile range; SD, standard deviation.

Bold indicates statistically significant P-values (P < 0.05)

**Supplementary Table 4 Comparison of clinical baseline data between the high-load group and the low-load group**

|  | high-load (N = 41) | low-load (N = 81) | p Value |
| --- | --- | --- | --- |
| **demographic characteristics** |  |  |  |
| Age，years（SD） | 66±11 | 61±11 | **0.017** |
| Sex，male，n（n%） | 21（51.2） | 48（59.3） | 0.204 |
| Pulse, beats/min（SD） | 73±11 | 71±10 | 0.215 |
| SBP, mmHg（SD） | 169±30 | 167±27 | 0.592 |
| DBP, mmHg（IQR） | 91±20 | 91±16 | 0.995 |
| **Vascular risk factors** |  |  |  |
| Hyperlipidemia，n（n%） | 16（39.0） | 42（51.9） | 0.180 |
| Hypertension, n (n%) | 33（80.5） | 53（65.4） | 0.085 |
| Diabetes,n (n%) | 15（36.6） | 29（35.8） | 0.932 |
| Smoking history,n (%) | 22（53.7） | 42（51.9） | 0.085 |
| Drinking history，n（%） | 10（24.4） | 26（32.1） | 0.378 |
| **Laboratory examination** |  |  |  |
| D-dimer(ng/L)（IQR） | 210（300，420） | 270（220，380） | 0.788 |
| Fibrinogen(g/L）（SD） | 3.10±0.70 | 3.00±0.64 | 0.343 |
| white blood cell count，109/L（SD） | 8.08±2.08 | 7.14±1.81 | **0.011** |
| C-reactive protein，mg/L（IQR） | 0.5（0.5，1.97） | 0.5（0.5,2.06） | 0.412 |
| TG，mmol/L（IQR） | 1.24（0.89，1.82） | 1.24(0.90,1.83) | 0.912 |
| TC，mmol/L（SD） | 4.54±0.99 | 4.54±0.92 | 0.993 |
| HDL,mmol/L（SD） | 1.17±0.29 | 1.15±0.34 | 0.713 |
| LDL,mmol/L（IQR） | 2.95（2.45.3.51） | 2.76（2.36，3.43） | 0.595 |
| Homocysteine, μmol/L(IQR) | 13.50（11.00,15。96） | 10.60（9.12，12.39） | **＜0.001** |
| Blood glucose,mmol/L（IQR） | 5.67（4.66，7.12） | 5.30(4.77,6.67) | 0.670 |
| glycosylated hemoglobin，%(IQR) | 6.4（5.5，7.5） | 6.65(5.70,7.00) | 0.780 |
| Uric acid,μmol/L（SD） | 310.75±75.41 | 312.62±67.18 | 0.717 |
| Sema3A，ng/L（SD） | 9.02±2.85 | 7.03±1.90 | **＜0.001** |

Abbreviations: SBP,systolic blood pressure;DBP, diastolic blood pressure; TG, triglyceride;TC: total cholesterol;HDL:high density lipoprotein；LDL: low density lipoprotein;IQR, interquartile range; SD, standard deviation.

Bold indicates statistically significant P-values (P < 0.05)

**Supplementary Figure 1.** Violin plot comparing plasma Sema3A levels in subgroup of HC：with vascular risk factors vs. subgroup without vascular risk factors ns: not significant.

**Supplementary Figure 2.** Violin plot comparison of plasma Sema3A levels in different subgroup of RSSI patients: (A) Males vs. females (B) High-age(≥60 years) vs. low-age（＜60 years） ns: not significant.
